# Supplementary material
Source: publisher site journal article supplement (https://www.spandidos-publications.com/6245/downloadSupplementary)
Supplement: Supplementary file 1 [file downloadSupplementary]

## Sheet: Table s1
Table SI. Characteristics of the genetic instrument variables for the nine gut microbiota at the genome-wide significance level (P<1x10-5).
A, Enterobacteriaceae family
SNP	chr	pos	A1	A2	β	SE	P	EAF	F-statistic	β2	SE2	P2
rs11026530	11	22379097	T	C	0.0822408	0.0186379	9.42692e-06	0.1499	19.4707	-0.0797	0.08	0.3194
rs111229068	11	2563450	A	T	0.110561	0.0241719	3.65359e-06	0.07913	20.921	-0.1297	0.1053	0.2179
rs2374342	2	42133542	C	A	0.0582927	0.0126195	4.51617e-06	0.4147	21.3375	-0.0874	0.0575	0.1286
rs35673018	16	54327745	G	A	0.0899642	0.0202934	7.63115e-06	0.09015	19.653	0.1354	0.0997	0.1748
rs4792380	17	13521040	A	T	0.115598	0.0257683	9.48965e-06	0.03039	20.1247	0.4276	0.1662	0.0101
rs504442	18	55145547	T	G	0.084159	0.0189479	5.17095e-06	0.1049	19.7278	-0.124	0.0929	0.1819
rs61973590	14	27718039	C	G	-0.0605392	0.0133696	8.53532e-06	0.3568	20.5039	0.0362	0.0595	0.5431
rs62210023	20	55340092	A	G	0.0606754	0.0130125	3.13163e-06	0.345	21.7422	-0.0725	0.0596	0.2242
rs78143293	18	57672335	A	G	-0.0848521	0.0170415	1.19564e-06	0.1222	24.7919	0.1755	0.086	0.04144
rs79757635	13	110840418	C	A	0.0758597	0.0171286	9.31859e-06	0.1368	19.6146	-0.1074	0.0846	0.2043
rs80319214	2	4015933	C	G	0.0990404	0.0215877	6.95312e-06	0.07522	21.0481	-0.152	0.1099	0.1669
B, Allisonella genus
SNP	chr	pos	A1	A2	β	SE	P	EAF	F-statistic	β2	SE2	P2
rs1901739	5	114286707	G	T	-0.115769	0.0248626	3.58798e-06	0.4629	21.6816	0.0228	0.0567	0.687401
rs35110698	12	28018998	T	C	-0.146322	0.0320852	5.72321e-06	0.1465	20.7974	0.1614	0.0801	0.0439097
rs35778461	9	100150556	C	T	0.146679	0.0297186	1.20629e-06	0.2278	24.3601	-0.0164	0.0673	0.8079
rs594561	11	88632972	T	C	-0.112231	0.0251681	9.41109e-06	0.4892	19.885	0.0403	0.0566	0.4764
rs602075	9	79110160	G	A	-0.168974	0.0296976	3.56574e-08	0.7366	32.3741	0.1032	0.0644	0.1089
rs6742198	2	33607071	A	G	-0.149152	0.0316484	3.34511e-06	0.7582	22.2103	0.0518	0.0664	0.4352
rs685403	18	75370866	G	C	-0.175203	0.0404474	4.88394e-06	0.1321	18.763	0.0346	0.0839	0.680299
rs76904847	7	137968010	G	A	0.148523	0.0334857	6.08751e-06	0.1763	19.6729	0.0386	0.0753	0.6083
rs7898615	10	122413451	T	G	0.167966	0.0373586	8.87279e-06	0.1369	20.2144	-0.1134	0.0832	0.1725
C, Lachnospiraceae FCS020 genus
SNP	chr	pos	A1	A2	β	SE	P	EAF	F-statistic	β2	SE2	P2
rs10093861	8	121244406	G	A	-0.0568869	0.0121152	3.05626e-06	0.4075	22.0477	-0.025	0.0577	0.6642
rs113859143	5	109403564	G	C	-0.108906	0.0242055	2.55452e-06	0.05653	20.243	0.0351	0.1244	0.777499
rs12078956	1	35328576	C	G	0.106101	0.0222904	2.15432e-06	0.1096	22.657	0.043	0.0921	0.6407
rs1254846	10	44346094	A	G	-0.105963	0.0232501	5.59667e-06	0.8558	20.7711	0.1053	0.0838	0.209
rs1363769	19	17865305	C	T	0.200628	0.0449372	1.58161e-06	0.968	19.9329	-0.2741	0.1597	0.0860696
rs2322265	4	166588085	C	T	-0.0666305	0.0141577	5.20811e-06	0.2651	22.1493	0.0056	0.0648	0.9311
rs2862811	3	165996415	C	T	-0.0564927	0.0121736	3.91913e-06	0.699	21.5351	0.0475	0.0618	0.4418
rs35035870	11	3248876	T	C	-0.190615	0.0414403	2.62029e-06	0.03923	21.1577	0.1343	0.1474	0.3622
rs369444	16	23631307	C	G	0.125481	0.0259008	3.14826e-06	0.0727	23.4709	0.0328	0.1099	0.7652
rs3999074	10	65563647	G	T	-0.0550587	0.0121847	6.55043e-06	0.494	20.4184	0.0081	0.0569	0.8865
rs4452603	6	71966268	T	G	0.0604208	0.0135965	8.98194e-06	0.2724	19.7478	-0.1159	0.0642	0.0710608
rs7249113	19	2571232	G	A	0.0679483	0.0133496	3.721e-07	0.2988	25.9072	-0.0626	0.0621	0.3134
rs72793667	2	53946431	A	G	-0.116881	0.0246589	1.63422e-06	0.04035	22.4668	0.0217	0.145	0.8811
rs9308097	4	165786478	G	A	-0.055381	0.0123659	7.47291e-06	0.5066	20.0572	0.0449	0.0566	0.4281
rs9788306	13	40419314	C	T	-0.062804	0.0130744	1.38618e-06	0.2877	23.0744	-0.0382	0.0627	0.5419
rs9919338	1	118425334	G	C	-0.0553339	0.0120621	4.90671e-06	0.4382	21.0444	0.0801	0.057	0.1601
D, Prevotella 7 genus
SNP	chr	pos	A1	A2	β	SE	P	EAF	F-statistic	β2	SE2	P2
rs118038478	16	47237609	A	G	0.205676	0.0468917	7.85416e-06	0.07035	19.2387	0.0489	0.1094	0.6548
rs12124567	1	3343802	A	G	-0.121281	0.0275017	9.48986e-06	0.2034	19.4476	0.0196	0.0714	0.783599
rs12195431	6	91019654	T	C	0.196528	0.0442322	8.72811e-06	0.0974	19.7411	0.1233	0.0963	0.2004
rs16937247	11	19943115	G	C	0.146098	0.0351529	9.63696e-06	0.2005	17.2729	0.0761	0.0712	0.2847
rs2240542	2	242066314	C	T	0.12085	0.0261776	4.8415e-06	0.265	21.3125	0.0234	0.0644	0.716101
rs2918132	10	133000320	T	C	0.114648	0.0254916	6.42407e-06	0.6279	20.2273	0.1007	0.0589	0.0875407
rs430270	3	60474379	A	C	0.139155	0.0297055	2.86847e-06	0.1905	21.9444	0.0985	0.073	0.1773
rs57404562	2	12101762	C	A	0.155486	0.0316057	6.2157e-07	0.1287	24.202	0.0099	0.0845	0.9064
rs79263163	11	39821773	A	C	-0.143982	0.031501	7.51052e-06	0.2002	20.8914	-0.07	0.0708	0.3228
rs9426434	1	29736216	T	C	-0.123657	0.0278514	9.71717e-06	0.3507	19.7126	0.0274	0.0597	0.6459
rs9608249	22	24613952	A	G	-0.158213	0.0336317	2.06685e-06	0.1126	22.1303	-0.0977	0.0891	0.273
rs9959718	18	71442664	G	A	0.133012	0.0275361	1.9006e-06	0.2034	23.3333	0.0323	0.0705	0.647301
E, Roseburia genus
SNP	chr	pos	A1	A2	β	SE	P	EAF	F-statistic	β2	SE2	P2
rs116270582	4	119349	T	A	-0.153844	0.0329324	1.19525e-06	0.04705	21.823	-0.1876	0.1424	0.1877
rs12740451	1	95178974	T	C	0.0697527	0.0153607	7.3426e-06	0.1349	20.6205	0.0897	0.0833	0.2815
rs16910295	11	12009569	T	C	-0.0980434	0.020957	2.91112e-06	0.0551	21.8866	0.0473	0.1258	0.7069
rs2034589	16	8307948	G	C	0.0629765	0.0123489	5.01164e-07	0.1782	26.0076	-0.0736	0.0743	0.3215
rs2160994	12	50650057	C	T	-0.0550687	0.0112481	9.6984e-07	0.665	23.9691	0.0288	0.0601	0.631401
rs2943022	5	89598914	T	C	0.0493786	0.0106763	4.11405e-06	0.5835	21.3912	0.0109	0.0575	0.8494
rs302266	1	194183650	T	C	-0.0777312	0.0172985	8.12587e-06	0.1276	20.1917	-0.0836	0.0856	0.3287
rs329182	5	125076494	T	C	0.0690327	0.0152884	5.90147e-06	0.1606	20.3885	-0.0083	0.0768	0.9134
rs4748237	10	16051097	G	C	0.0488326	0.0106404	4.67218e-06	0.4355	21.0622	0.0409	0.0572	0.475
rs55858165	15	86512809	A	C	0.179284	0.0404954	9.98964e-06	0.03779	19.6007	0.2923	0.1503	0.0516999
rs57466170	15	37859065	C	T	0.0741405	0.0171601	8.30099e-06	0.07512	18.6669	-0.0419	0.1087	0.7
rs6445851	3	57116228	A	G	0.0497336	0.0108158	3.5272e-06	0.6272	21.1438	0.0691	0.0585	0.2376
rs6930661	6	12774611	C	T	-0.0961587	0.0204975	2.47942e-06	0.06097	22.0077	-0.0755	0.1208	0.5318
rs75326254	6	166170836	C	T	-0.104628	0.0230897	7.50205e-06	0.05894	20.5333	0.0739	0.1182	0.5317
rs75820970	10	79277321	C	G	-0.232125	0.0481562	1.47798e-07	0.1252	23.2348	-0.1221	0.0865	0.1579
rs78753150	5	144135655	A	C	0.0968739	0.0214067	9.98321e-06	0.09952	20.4793	0.0935	0.0952	0.3258
rs9300744	13	103117486	C	T	-0.0588452	0.0126228	4.75116e-06	0.1792	21.7325	-0.1161	0.074	0.1165
F, Ruminococcaceae UCG004 genus
SNP	chr	pos	A1	A2	β	SE	P	EAF	F-statistic	β2	SE2	P2
rs10976229	9	7317307	T	G	0.095976	0.0214554	7.04482e-06	0.1294	20.0102	-0.0698	0.0848	0.4102
rs11961899	6	132887921	G	A	-0.0707825	0.0161381	9.18015e-06	0.2788	19.2374	0.0231	0.0632	0.7146
rs12125734	1	103732214	G	T	0.133972	0.0257416	2.09426e-07	0.09347	27.0868	-0.0076	0.098	0.9383
rs2248146	7	24791998	T	C	0.0689452	0.0153649	8.19993e-06	0.3449	20.1349	0.0116	0.0594	0.8452
rs3800154	6	2119329	A	C	-0.0797959	0.0177639	6.11575e-06	0.2645	20.1783	0.1591	0.0644	0.0134301
rs511258	3	169966722	G	A	-0.0757474	0.0162475	4.52054e-06	0.1869	21.7351	0.0307	0.0725	0.671699
rs550351	1	18676399	A	C	0.078587	0.018003	9.43127e-06	0.425	19.0551	0.0386	0.0572	0.5
rs6769553	3	54427795	A	G	0.0849743	0.0157451	7.91061e-08	0.2615	29.1262	-0.1328	0.0644	0.03925
rs7123615	11	15771251	C	G	-0.0786157	0.0179592	7.09186e-06	0.1957	19.1622	-0.0178	0.0712	0.8021
rs7569771	2	239846337	A	G	-0.075914	0.0170308	8.1197e-06	0.248	19.8689	0.0941	0.0663	0.1556
rs872501	8	139253064	G	A	0.116125	0.025946	5.80805e-06	0.09935	20.0314	0.0168	0.1074	0.8757
rs9818949	3	197683751	T	G	-0.0859927	0.0188671	5.38828e-06	0.7969	20.7737	0.0467	0.0717	0.515101
G, Ruminococcaceae UCG009 genus
SNP	chr	pos	A1	A2	β	SE	P	EAF	F-statistic	β2	SE2	P2
rs113006825	6	51803869	T	C	-0.0928893	0.0208035	7.97701e-06	0.2168	19.9369	0.1283	0.0694	0.0646294
rs12508214	4	7426937	C	T	-0.0774649	0.0168937	4.75488e-06	0.3386	21.0262	0.097	0.0604	0.108
rs138460696	2	66396776	A	G	0.139274	0.0315794	9.80844e-06	0.07696	19.4506	-0.1561	0.1074	0.1463
rs1550196	17	32786955	A	G	-0.130842	0.0262478	1.13287e-06	0.9004	24.849	0.053	0.0951	0.577301
rs2058609	12	12970792	G	A	-0.0816464	0.017472	3.12486e-06	0.7231	21.8368	0.065	0.0632	0.3044
rs2192926	2	75512668	A	G	-0.089048	0.0192989	4.87742e-06	0.3284	21.2904	0.014	0.0603	0.817
rs4079028	1	202299085	C	T	0.0915623	0.019936	3.28246e-06	0.2395	21.0939	-0.0219	0.0665	0.7418
rs4708333	6	78106701	T	G	-0.084033	0.0174757	1.56246e-06	0.3406	23.1223	0.02	0.0602	0.7391
rs61779334	1	39983022	G	C	-0.138137	0.0292072	1.94241e-06	0.09806	22.3687	0.0353	0.0951	0.7104
rs6952765	7	32001710	G	A	0.0732099	0.0166777	8.13055e-06	0.3184	19.2694	-0.0292	0.0609	0.6313
rs758191	16	1979831	T	G	0.17702	0.0375113	9.0099e-06	0.1018	22.27	-0.0884	0.0957	0.3557
rs78410648	19	52399401	A	G	0.120989	0.0277317	9.67208e-06	0.1092	19.0344	0.1239	0.0909	0.1729
rs8009993	14	39306809	G	C	-0.135936	0.0244857	4.42181e-08	0.154	30.8208	0.1063	0.0796	0.1816
rs9558661	13	106650093	T	C	-0.0897823	0.0200739	7.00842e-06	0.2039	20.0041	0.0271	0.0711	0.7028
H, Ruminococcaceae UCG014 genus
SNP	chr	pos	A1	A2	β	SE	P	EAF	F-statistic	β2	SE2	P2
rs10495392	1	237422989	T	C	0.082486	0.0187194	9.96323e-06	0.9265	19.4168	-0.0403	0.1079	0.709
rs10791168	11	131659000	G	A	0.0664624	0.0150069	9.7618e-06	0.8152	19.6142	0.0267	0.0737	0.7175
rs10941294	5	36435597	C	T	-0.122057	0.0260017	2.39701e-06	0.05429	22.0354	-0.1527	0.1256	0.2238
rs115777838	5	26110626	T	C	-0.18835	0.0386643	4.62328e-07	0.1132	23.7307	-0.1032	0.0899	0.2514
rs12638134	3	101334609	T	G	0.0582548	0.0119657	1.21143e-06	0.4166	23.7021	0.0693	0.0573	0.2263
rs17296933	19	49175964	C	G	-0.0829544	0.0185058	7.33719e-06	0.1138	20.0938	0.0788	0.0899	0.3808
rs34402072	8	3636548	C	T	-0.0688023	0.0156083	9.80438e-06	0.1465	19.431	-0.0217	0.0805	0.7872
rs439810	2	119467367	C	G	0.0577127	0.0126675	7.0419e-06	0.6714	20.7568	0.0282	0.0603	0.6404
rs56105232	9	14363769	G	A	0.139276	0.0299132	2.9128e-06	0.0626	21.6784	0.058	0.1211	0.632
rs61898819	11	126024042	A	T	0.0607865	0.0138761	9.91791e-06	0.1911	19.1902	0.064	0.0723	0.3763
rs62478832	7	109564034	T	A	-0.058129	0.012903	6.04422e-06	0.3411	20.2957	0.0213	0.0597	0.721499
rs72809222	2	57205854	T	C	0.0671775	0.0139838	2.4119e-06	0.2117	23.078	-0.0278	0.0692	0.6876
rs73186226	3	123829361	G	A	-0.0993852	0.0216819	6.71754e-06	0.07543	21.0111	-0.1937	0.1105	0.0797297
rs74060145	1	15322582	C	G	-0.115767	0.0254199	8.70502e-06	0.07871	20.7406	0.024	0.1054	0.8198
rs79640386	18	4084336	T	A	-0.110863	0.0248098	8.73756e-06	0.1318	19.9676	-0.073	0.0839	0.3841
rs853612	10	119928413	A	G	-0.0528257	0.0119367	9.75461e-06	0.3955	19.5849	0.0167	0.058	0.772601
rs995642	2	134854659	C	T	0.060048	0.0126417	1.90222e-06	0.239	22.5624	0.0838	0.0664	0.2072
I, Enterobacteriales order
SNP	chr	pos	A1	A2	β	SE	P	EAF	F-statistic	β2	SE2	P2
rs11026530	11	22379097	T	C	0.0822408	0.0186379	9.42692e-06	0.1499	19.4707	-0.0797	0.08	0.3194
rs111229068	11	2563450	A	T	0.110561	0.0241719	3.65359e-06	0.07913	20.921	-0.1297	0.1053	0.2179
rs2374342	2	42133542	C	A	0.0582927	0.0126195	4.51617e-06	0.4147	21.3375	-0.0874	0.0575	0.1286
rs35673018	16	54327745	G	A	0.0899642	0.0202934	7.63115e-06	0.09015	19.653	0.1354	0.0997	0.1748
rs4792380	17	13521040	A	T	0.115598	0.0257683	9.48965e-06	0.03039	20.1247	0.4276	0.1662	0.0101
rs504442	18	55145547	T	G	0.084159	0.0189479	5.17095e-06	0.1049	19.7278	-0.124	0.0929	0.1819
rs61973590	14	27718039	C	G	-0.0605392	0.0133696	8.53532e-06	0.3568	20.5039	0.0362	0.0595	0.5431
rs62210023	20	55340092	A	G	0.0606754	0.0130125	3.13163e-06	0.345	21.7422	-0.0725	0.0596	0.2242
rs78143293	18	57672335	A	G	-0.0848521	0.0170415	1.19564e-06	0.1222	24.7919	0.1755	0.086	0.04144
rs79757635	13	110840418	C	A	0.0758597	0.0171286	9.31859e-06	0.1368	19.6146	-0.1074	0.0846	0.2043
rs80319214	2	4015933	C	G	0.0990404	0.0215877	6.95312e-06	0.07522	21.0481	-0.152	0.1099	0.1669
